# Supplementary material
Source: publisher site journal article supplement (https://www.dovepress.com/article/515565)
Supplement: Supplementary file 1 [file 515565-Supplementary-Table.docx]

**Supplementary Table 1: Per-participant characteristics and infusion parameters**

| **Patient ID** | **Age range** | **Gender** | **SCIg product and configuration** | **Dosing frequency** | **Infusion volume range** | **Number of sites** | **Average infusion duration range** | **Current  delivery device** | **Duration of experience with current device** | **Experience  with prior device** |
| --- | --- | --- | --- | --- | --- | --- | --- | --- | --- | --- |
| P1 | 46-55 | Female | HyQvia, vial | Every month | 20-50 mL | 2 | 2-3 hours | CURLIN 6000 | Less than 1 year | Yes |
| P2 | 56-65 | Female | HyQvia, vial | Every 3 weeks | 20-50 mL | 2 | 3+ hours | CURLIN 6000 | 1-2 years | Yes |
| P3 | 36-45 | Female | Hizentra, PFS | Every week | 50-100 mL | 3+ | 1-2 hours | Crono S-PID 50 | 3-5 years | Yes |
| P4 | 36-45 | Female | HyQvia, vial | Every 3 weeks | Over 100 mL | 2 | 3+ hours | CADD-Solis VIP | 3-5 years | Yes |
| P5 | 56-65 | Male | Hizentra, vial | Every week | 50-100 mL | 1 | <1 hour | Freedom60 | More than 5 years | No |
| P6 | 56-65 | Female | Xembify, vial | Every week | 50-100 mL | 2 | 3+ hours | Freedom60 | More than 5 years | Yes |
| P7 | 65+ | Female | Hizentra, vial | Every week | 20-50 mL | 3+ | 1-2 hours | Freedom60 | More than 5 years | No |
| P8 | 36-45 | Female | Hizentra, vial | Every week | 50-100 mL | 3+ | 1-2 hours | Freedom60 | 3-5 years | No |
| P9 | 36-45 | Female | Hizentra, vial | Every week | 20-50 mL | 3+ | 1-2 hours | Freedom60 | 1-2 years | Yes |
| P10 | 46-55 | Female | Cuvitru, vial | Every 2 weeks | 20-50 mL | 3+ | 3+ hours | SCIg60 | 3-5 years | Yes |
| P11 | 36-45 | Female | Cuvitru, vial | Every 10 days | 50-100 mL | 2 | 1-2 hours | SCIg60 | More than 5 years | No |

**Abbreviations:** PFS: prefilled syringe
